# Supplementary material
Source: PubMed Central journal article supplement (PMC6900254)

## Supporting Information

### Visible Light Induced Metal-free Carbene *N*-Carbazolation

Claire Empel, Frederic W. Patureau\* and Rene M. Koenigs\*

frederic.patureau@rwth-aachen.de  
rene.koenigs@rwth-aachen.de

#### Table of contents

|                               |    |
|-------------------------------|----|
| Picture of the Reaction Setup | S2 |
| Spectra of Compounds          | S3 |

## Picture of the Reaction Setup

Picture is after reaction with a red-filter

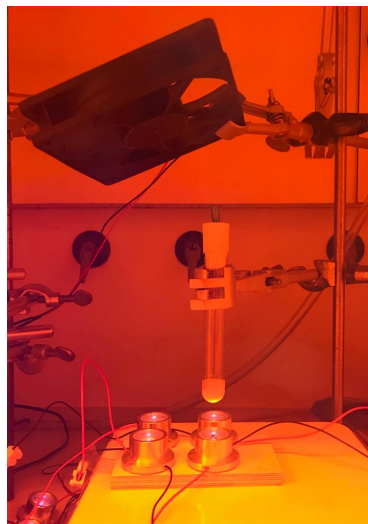

## Spectra of Compounds

Methyl 2-(9*H*-carbazol-9-yl)-2-phenylacetate (**6aa**)

$^1\text{H}$  NMR (600 MHz, Chloroform-*d*)

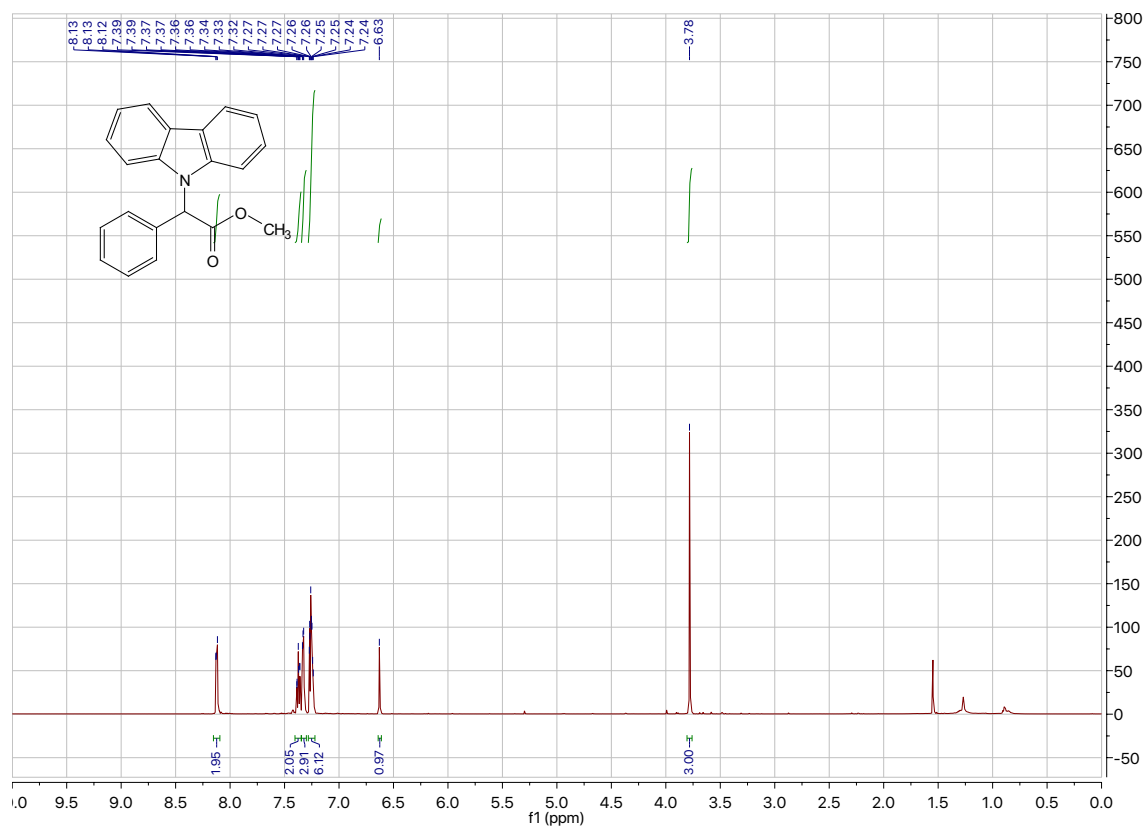

$^{13}\text{C}$  NMR (151 MHz, Chloroform-*d*)

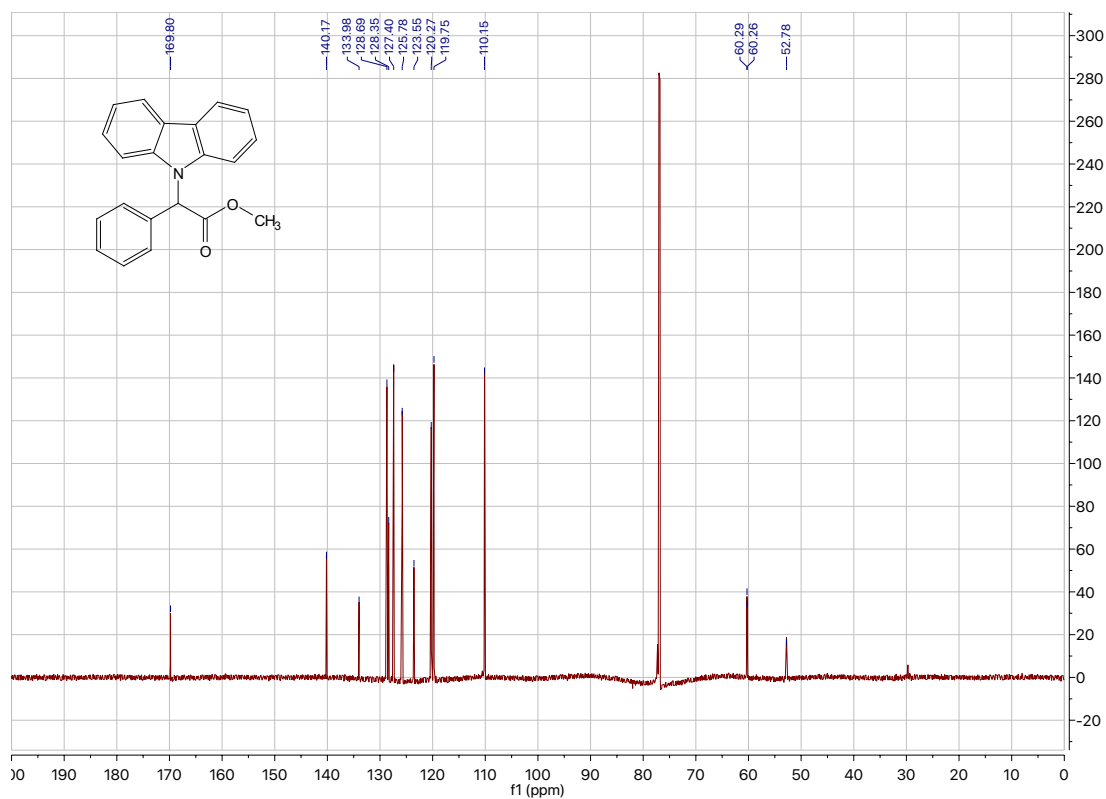

Methyl 2-(9*H*-carbazol-9-yl)-2-(4-fluorophenyl)acetate (**6ab**)

<sup>1</sup>H NMR (600 MHz, Chloroform-*d*)

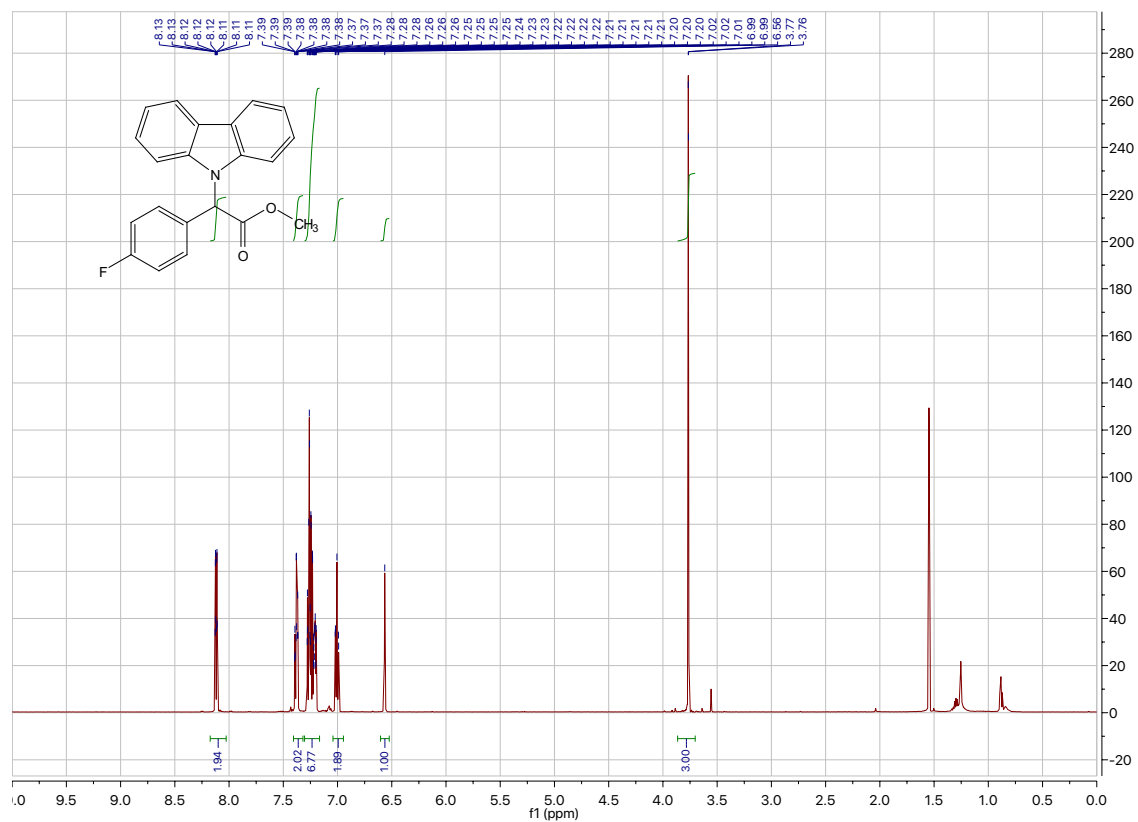

<sup>13</sup>C NMR (151 MHz, Chloroform-*d*)

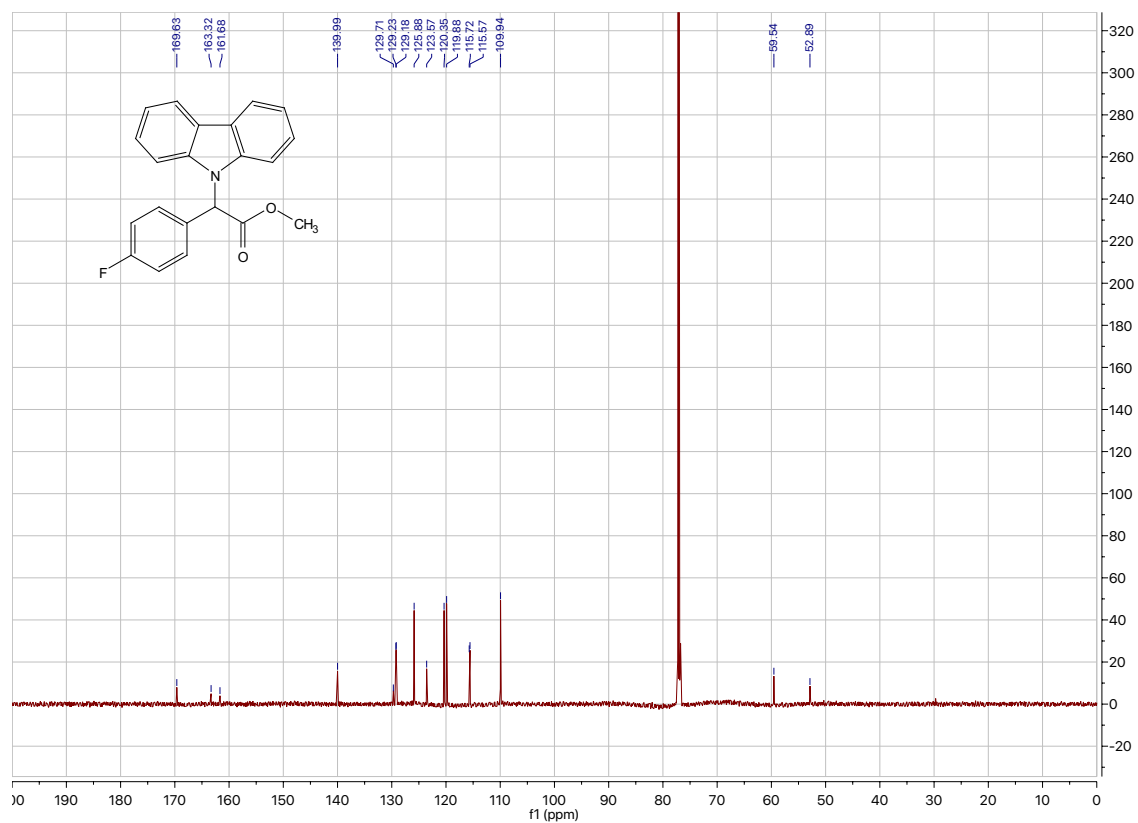

**<sup>19</sup>F NMR (564 MHz, Chloroform-*d*)**

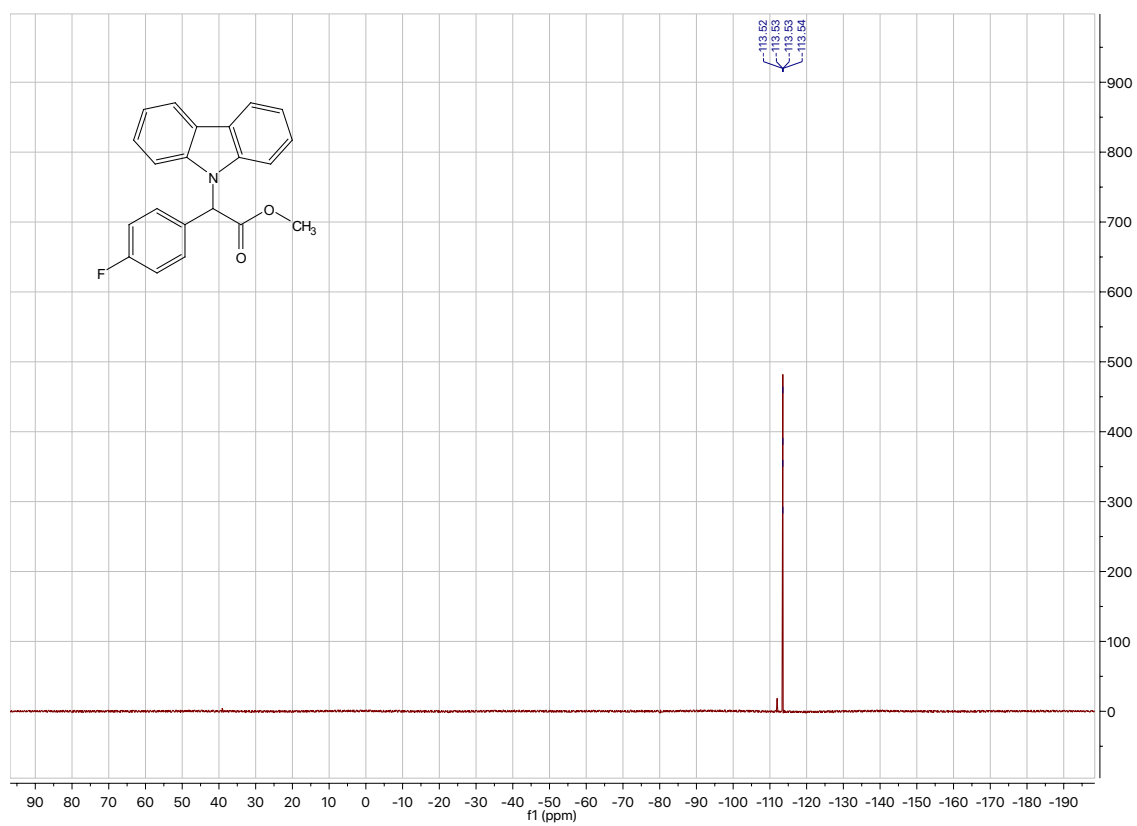

Methyl 2-(9*H*-carbazol-9-yl)-2-(4-chlorophenyl)acetate (**6ac**)

<sup>1</sup>H NMR (600 MHz, Chloroform-*d*)

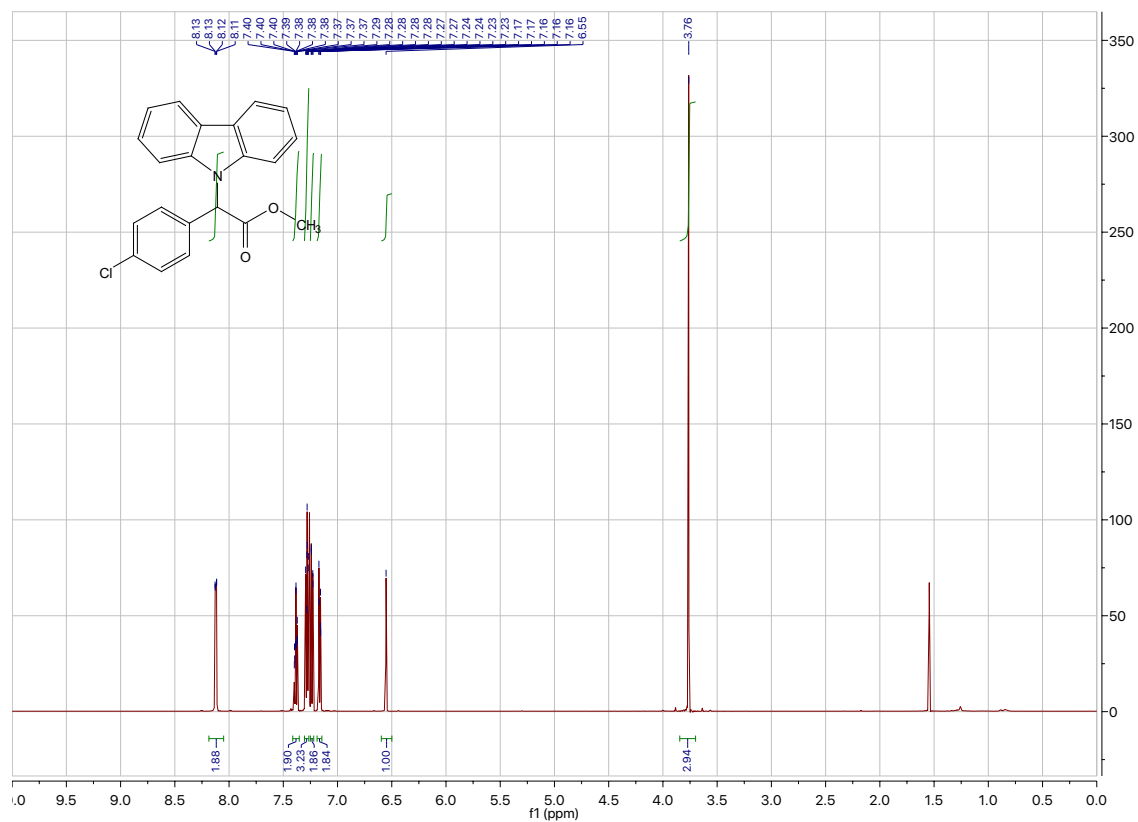

<sup>13</sup>C NMR (151 MHz, Chloroform-*d*)

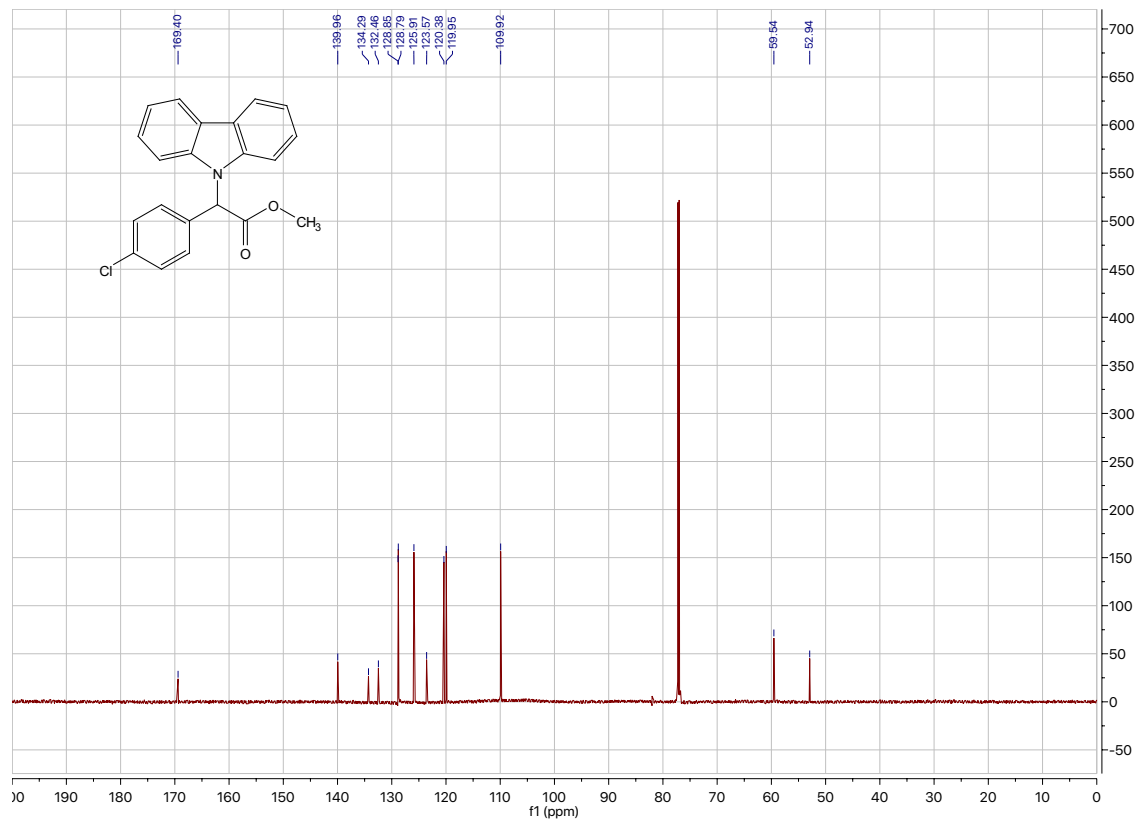

# Methyl 2-(9*H*-carbazol-9-yl)-2-(3-methoxyphenyl)acetate (**6ad**)

<sup>1</sup>H NMR (400 MHz, Chloroform-*d*)

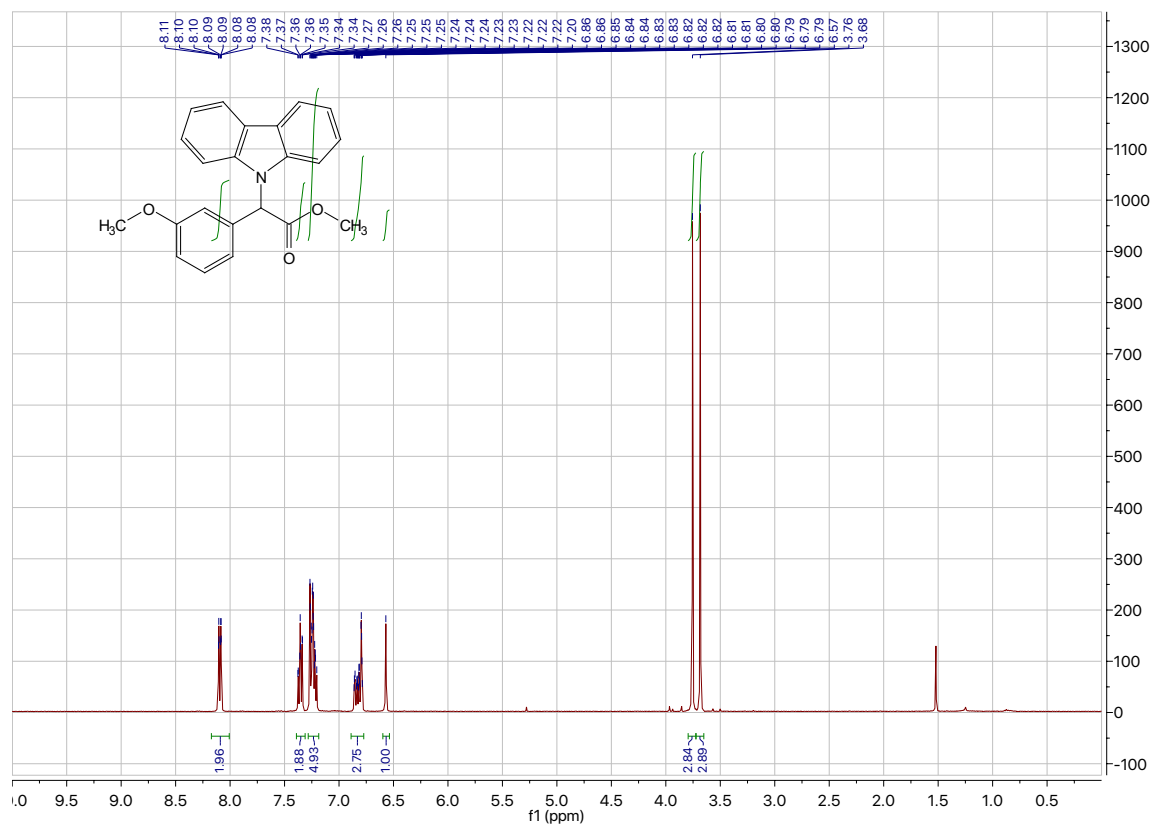

<sup>13</sup>C NMR (101 MHz, Chloroform-*d*)

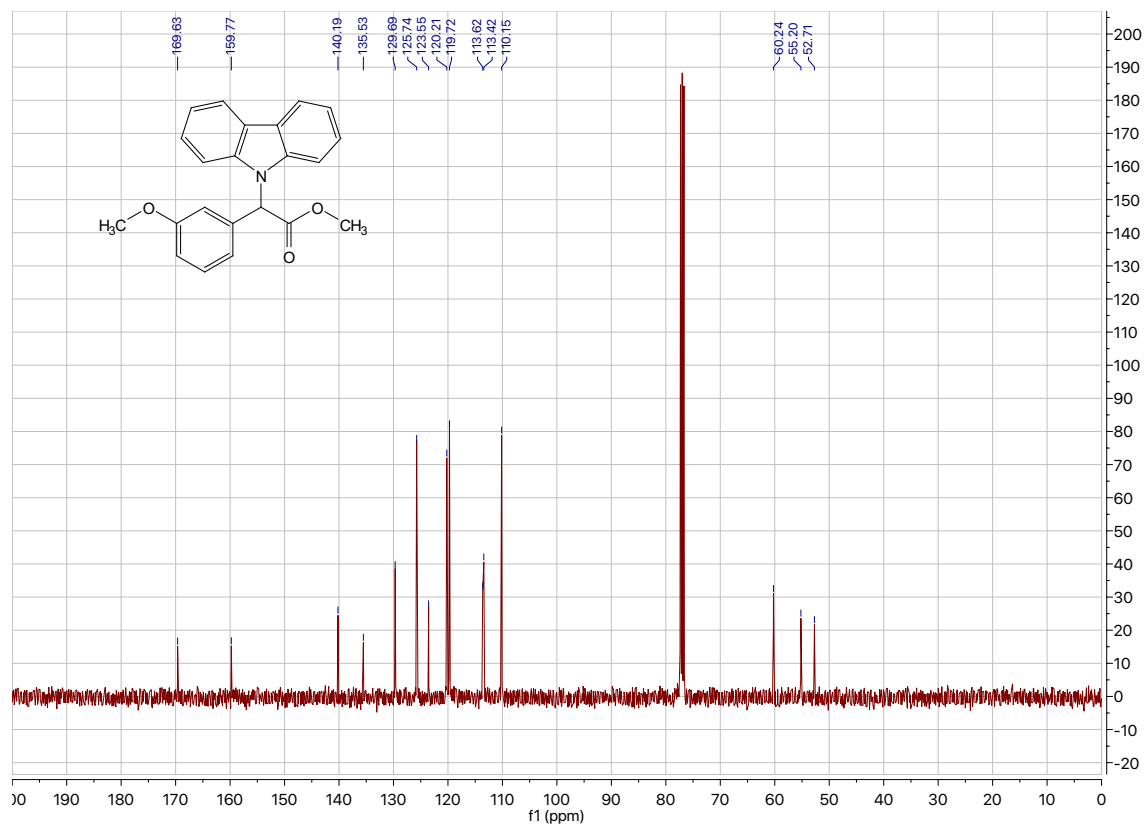





# Benzyl 2-(9H-carbazol-9-yl)-2-phenylacetate (**6af**)

<sup>1</sup>H NMR (400 MHz, Chloroform-*d*)

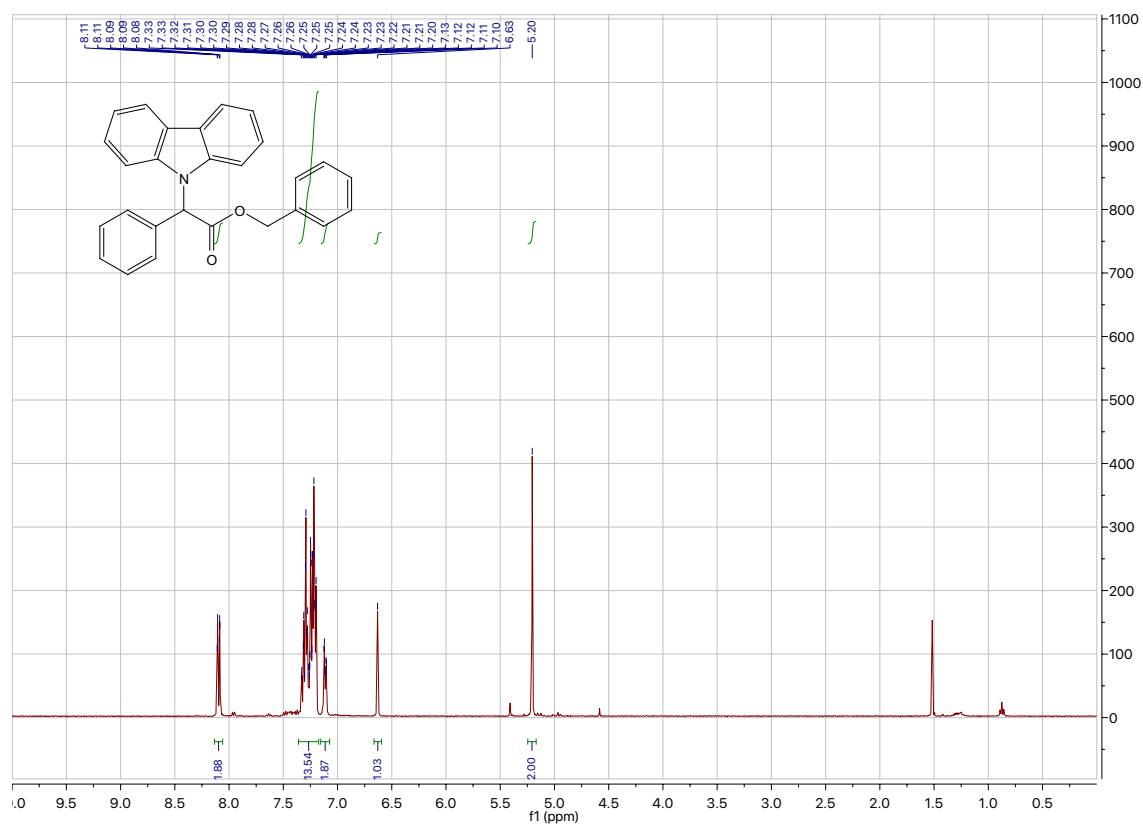

<sup>13</sup>C NMR (101 MHz, Chloroform-*d*)

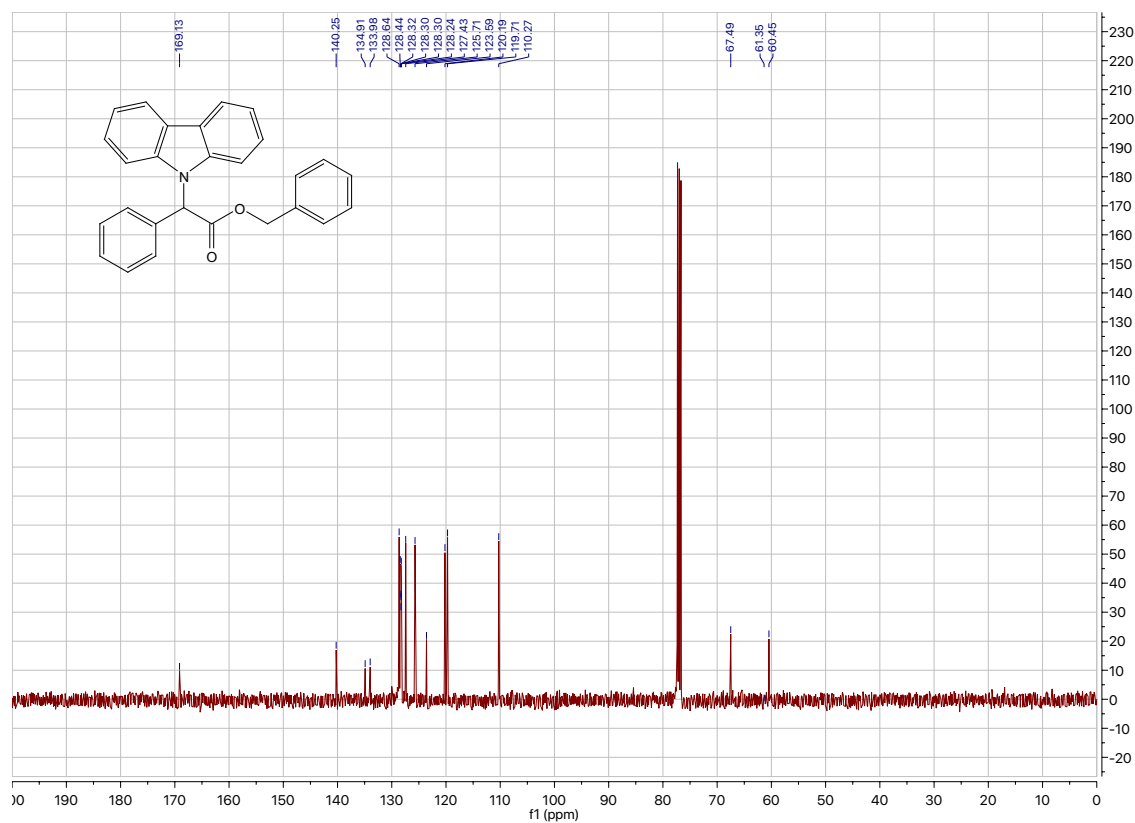



Methyl 2-(3,6-di-*tert*-butyl-9*H*-carbazol-9-yl)-2-phenylacetate (**6ca**)

$^1\text{H}$  NMR (600 MHz, Chloroform-*d*)

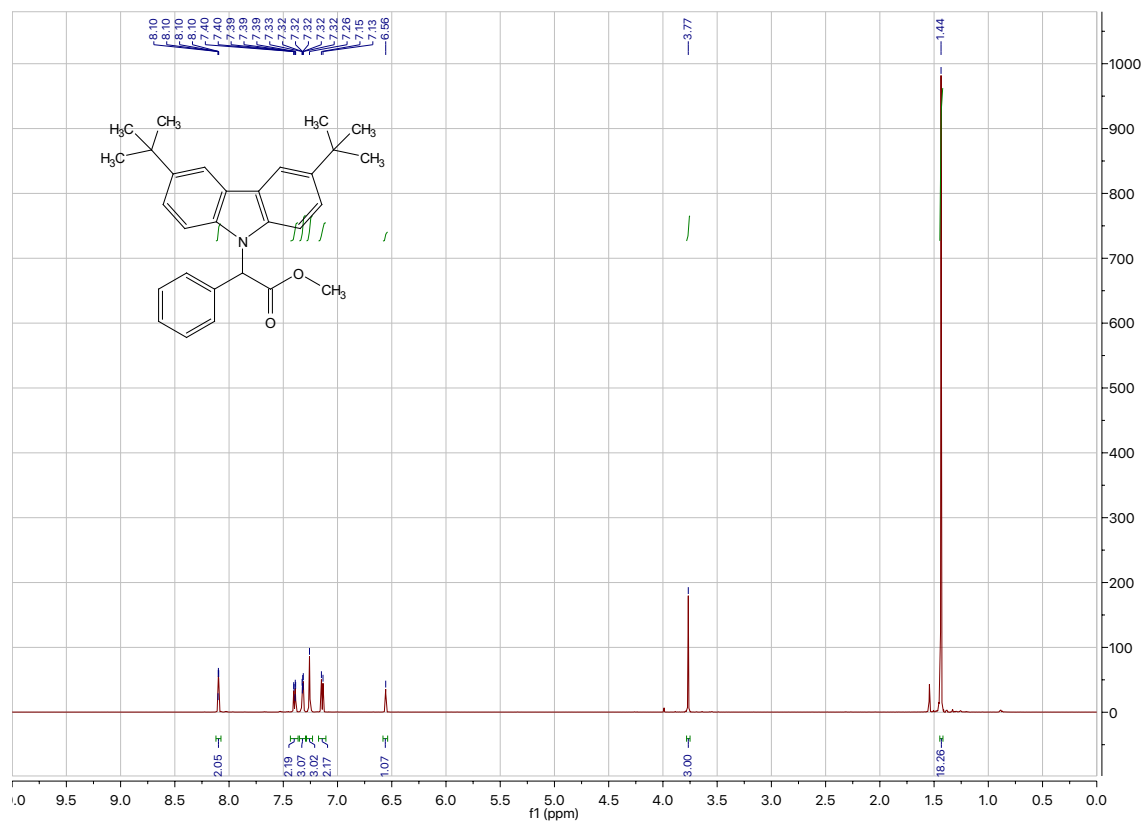

$^{13}\text{C}$  NMR (151 MHz, Chloroform-*d*)

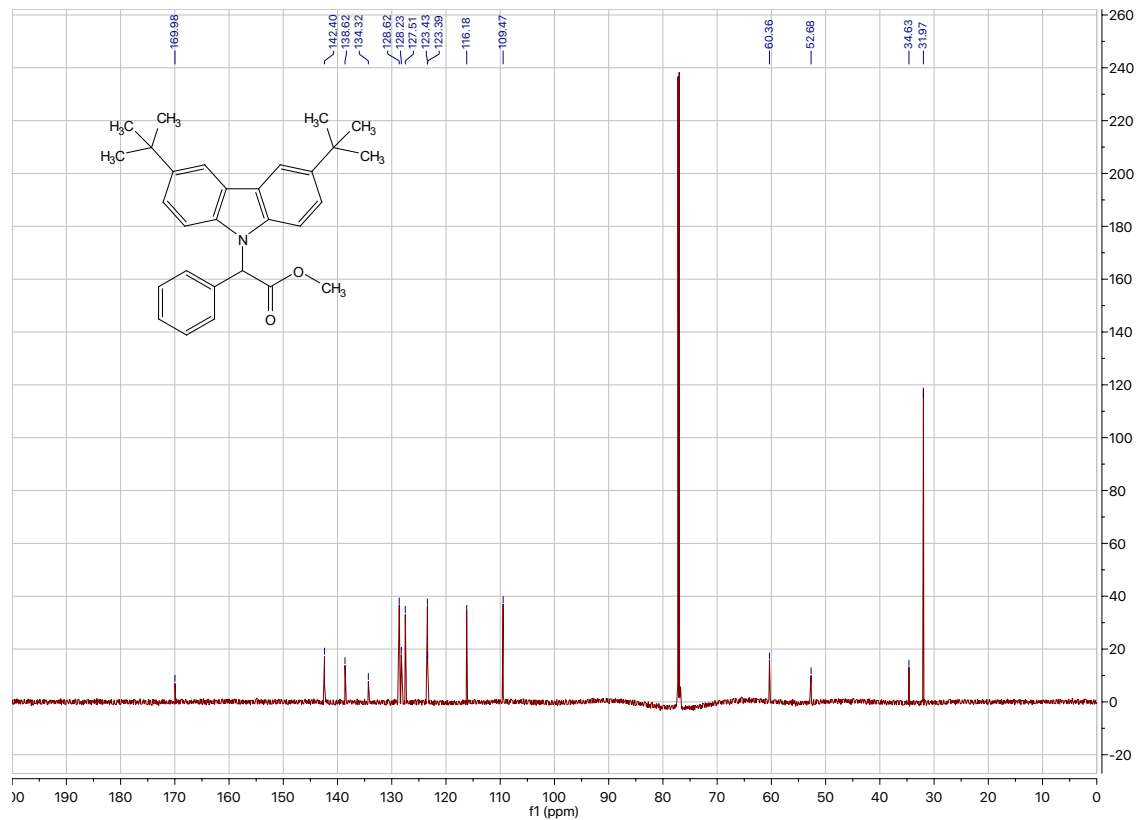

# Methyl 2-(3,6-dichloro-9H-carbazol-9-yl)-2-phenylacetate (**6da**)

$^1\text{H}$  NMR (600 MHz, Chloroform-*d*)

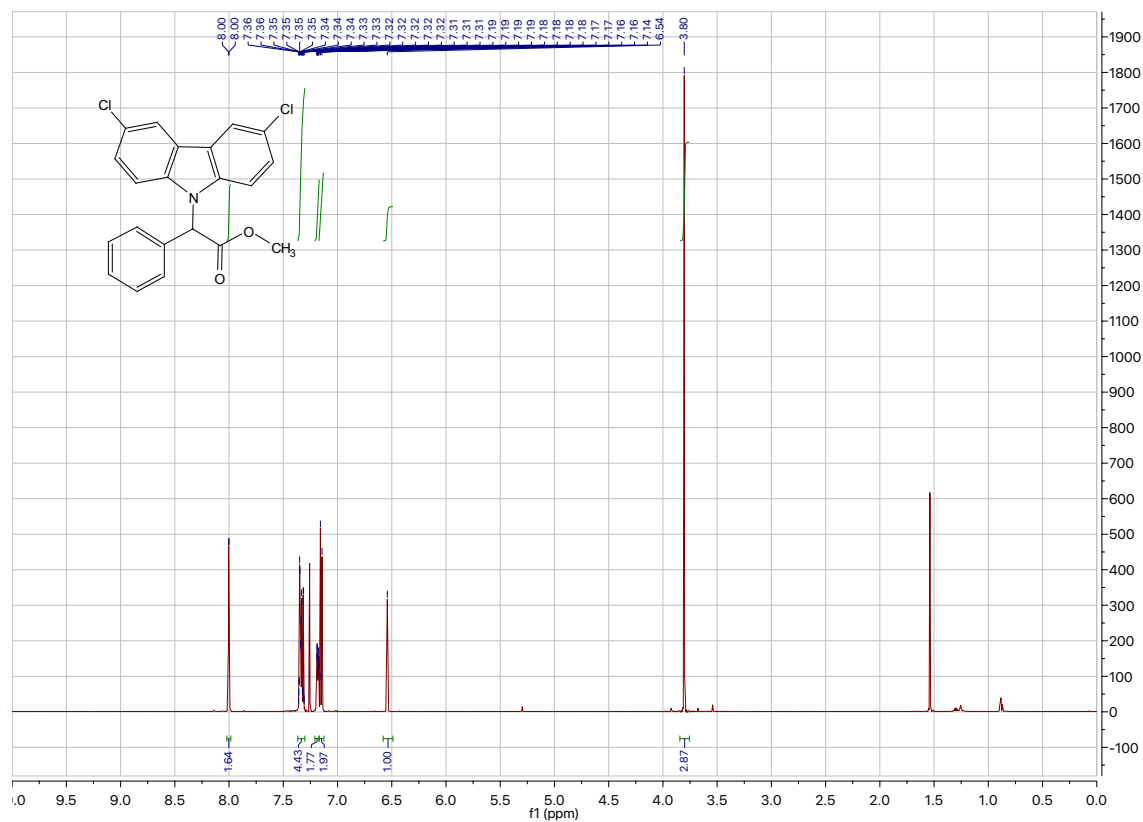

$^{13}\text{C}$  NMR (151 MHz, Chloroform-*d*)

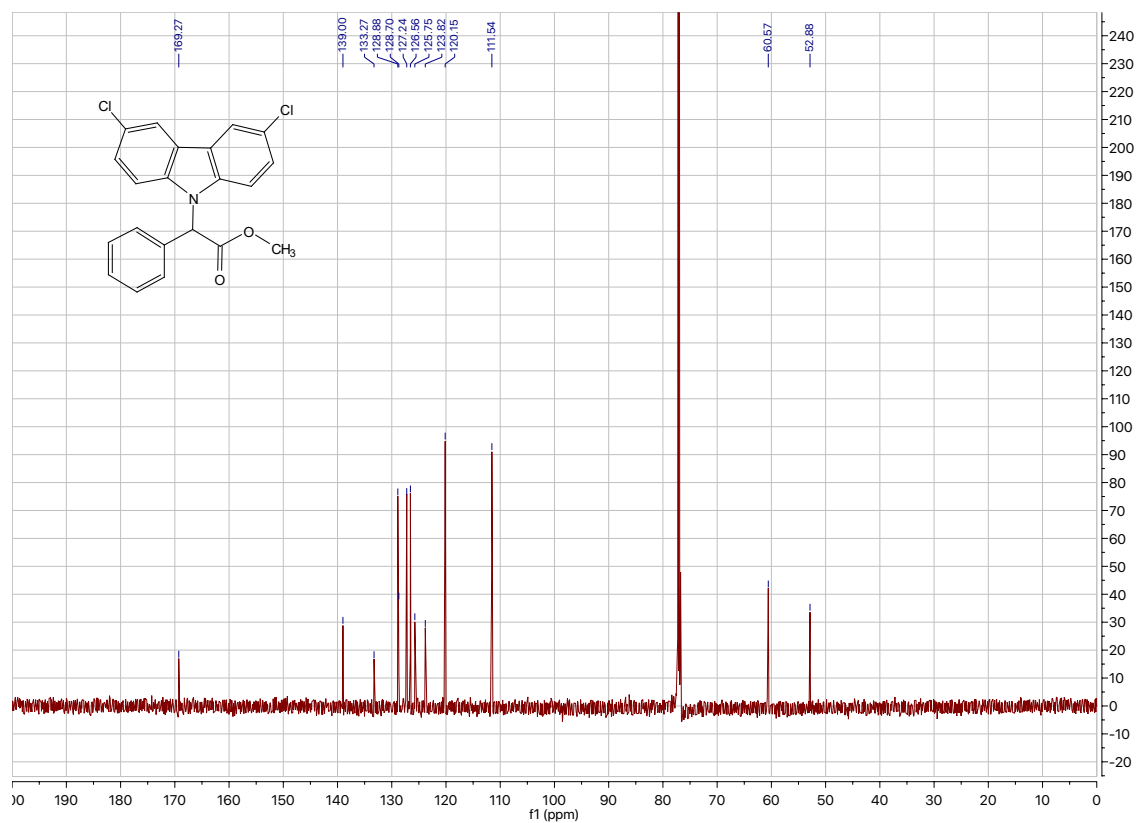

Methyl 2-(3,6-dibromo-9*H*-carbazol-9-yl)-2-phenylacetate (**6ea**)

<sup>1</sup>H NMR (600 MHz, Chloroform-*d*)

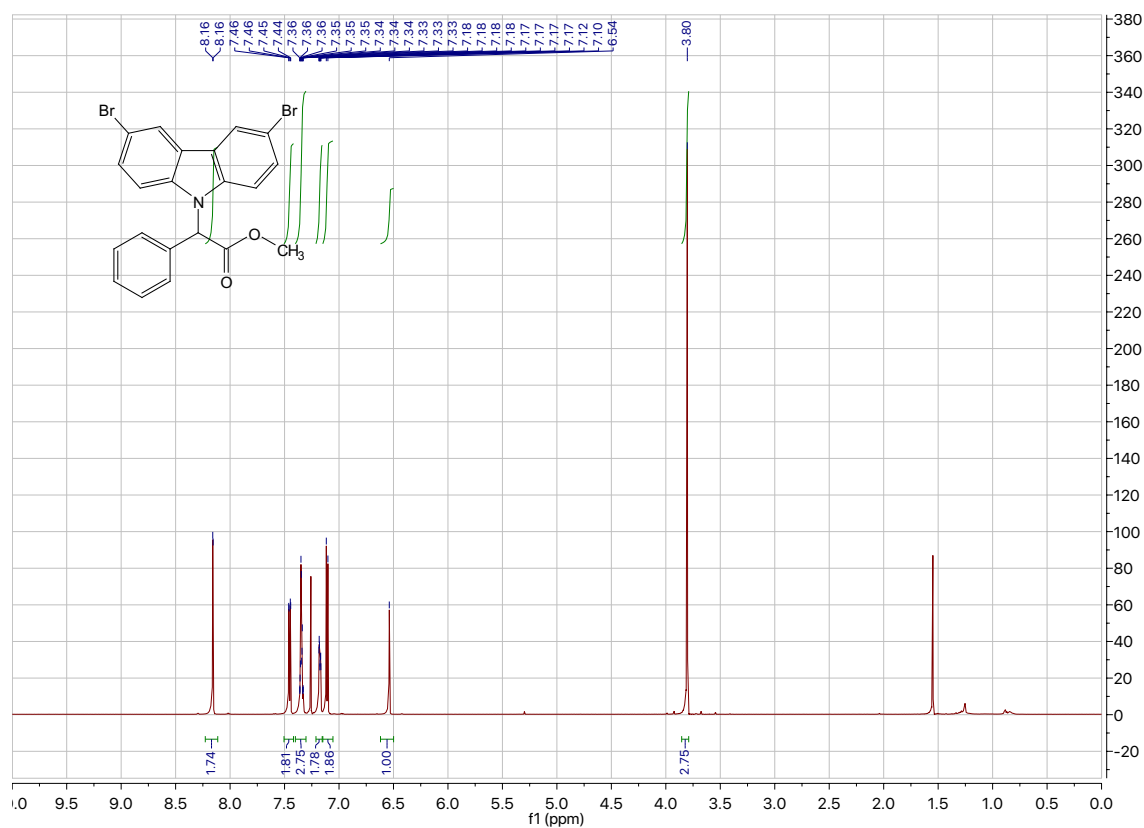

<sup>13</sup>C NMR (151 MHz, Chloroform-*d*)

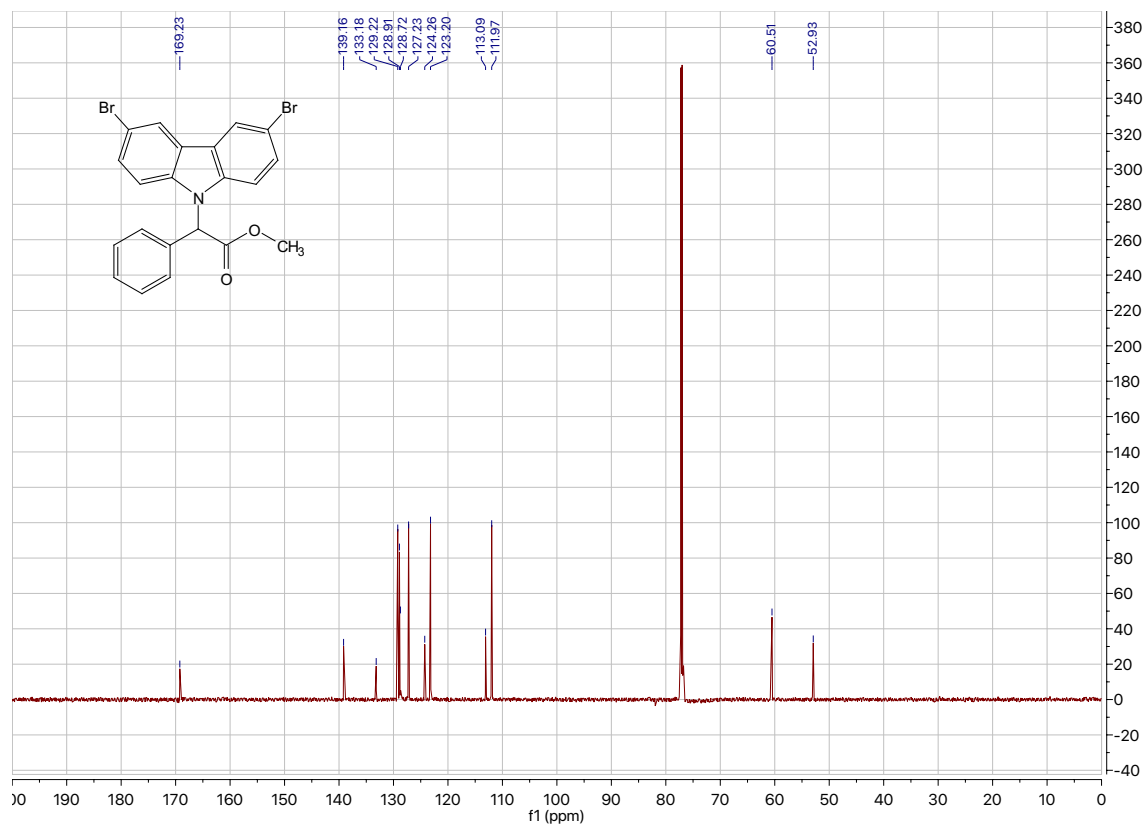

Methyl 2-(2,7-dibromo-9*H*-carbazol-9-yl)-2-phenylacetate (**6fa**)

$^1\text{H}$  NMR (600 MHz, Chloroform-*d*)

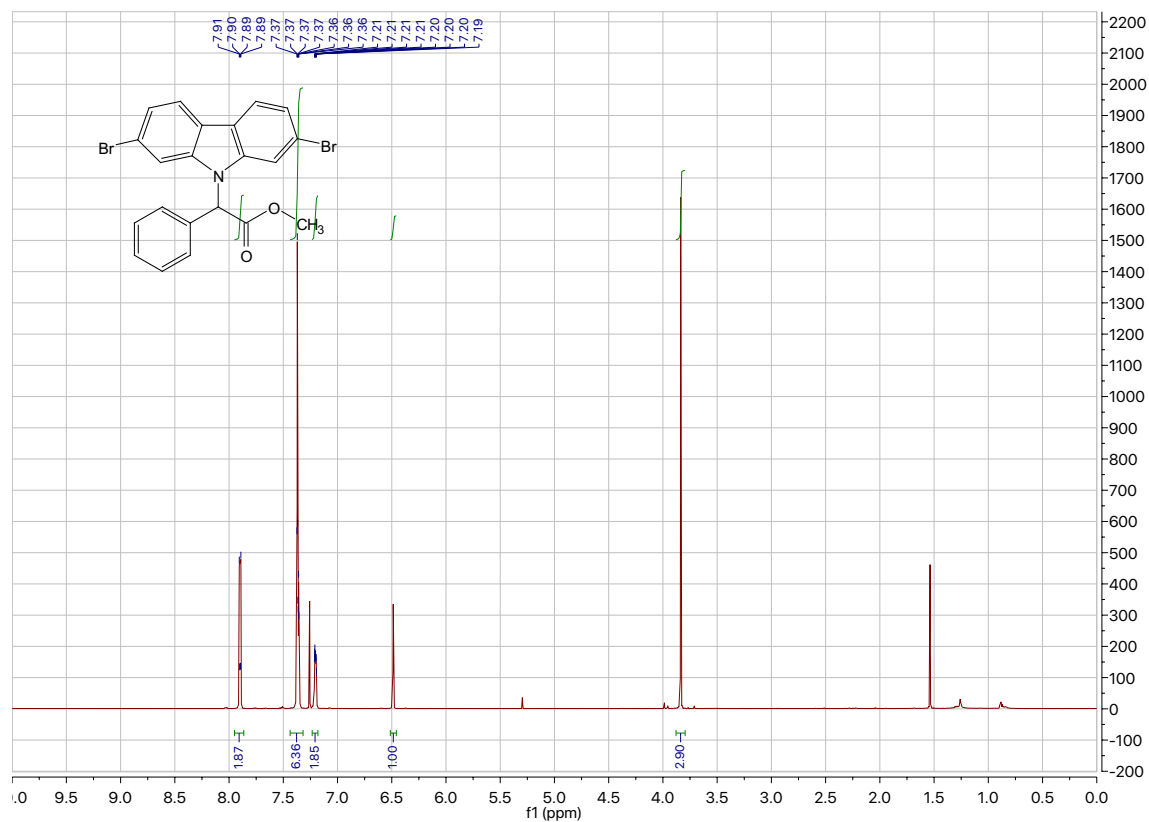

$^{13}\text{C}$  NMR (151 MHz, Chloroform-*d*)

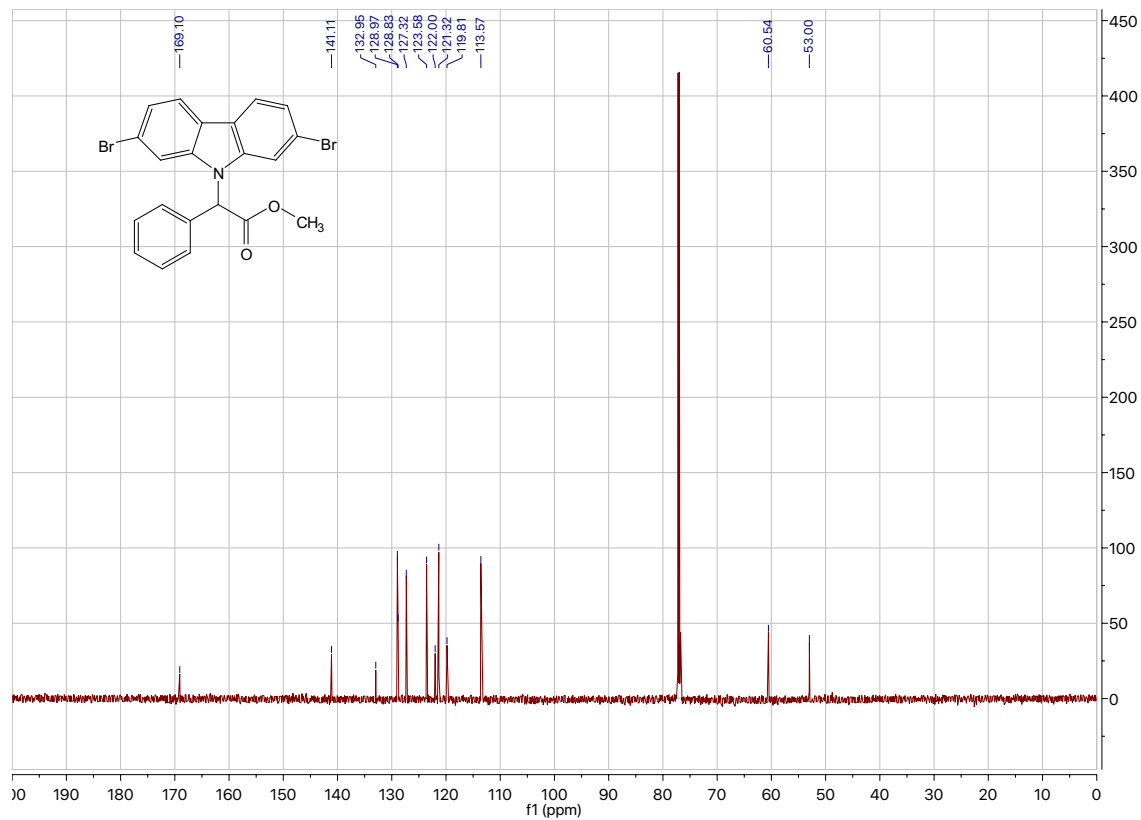



Methyl 2-(3-fluoro-9*H*-carbazol-9-yl)-2-phenylacetate (**6ha**)

$^1\text{H}$  NMR (600 MHz, Chloroform-*d*):

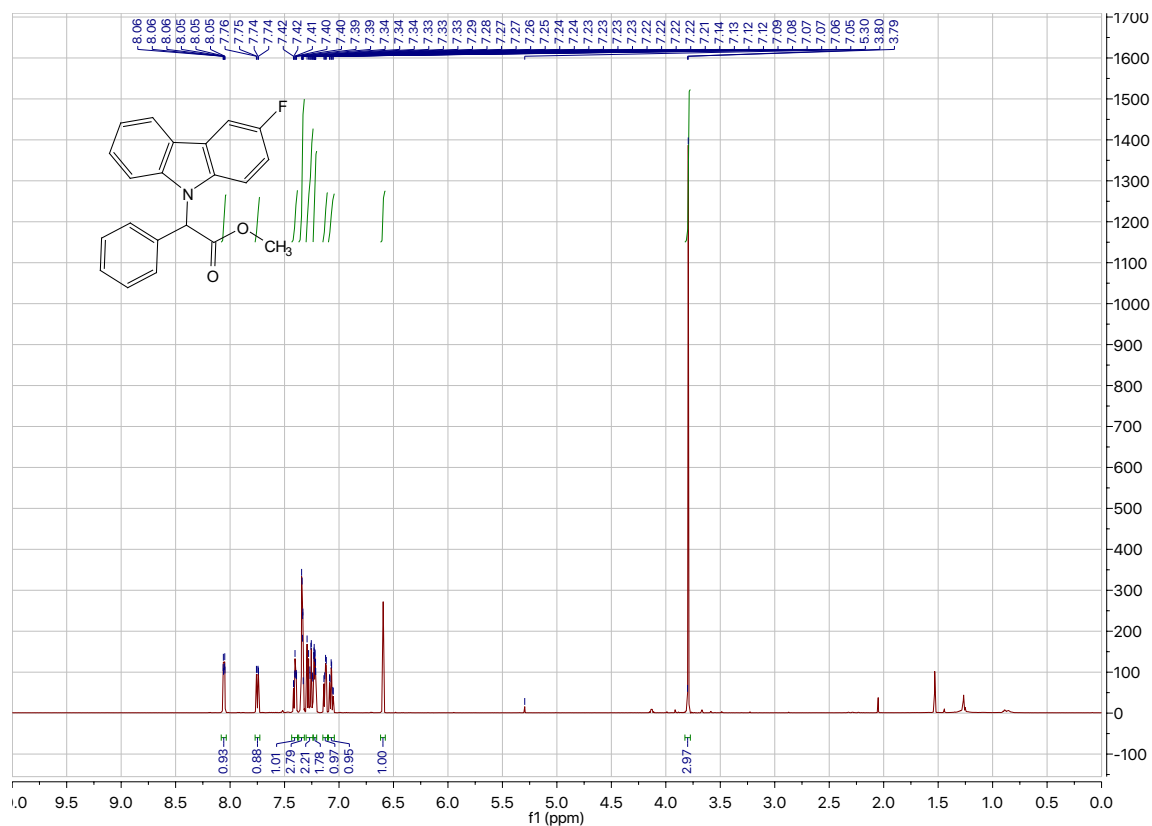



**<sup>19</sup>F NMR (564 MHz, Chloroform-*d*)**

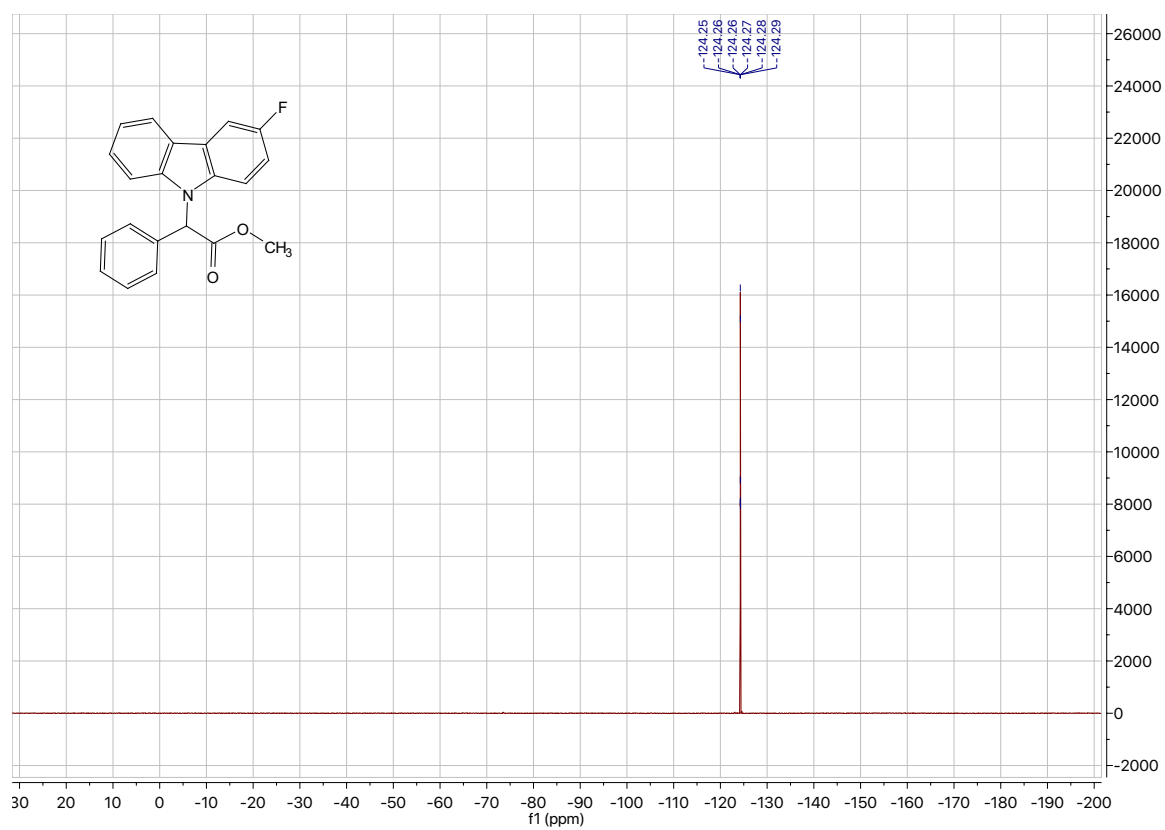

# Methyl 2-(3-fluoro-9H-carbazol-9-yl)-2-(4-fluorophenyl)acetate (6hb)

<sup>1</sup>H NMR (600 MHz, Chloroform-*d*)

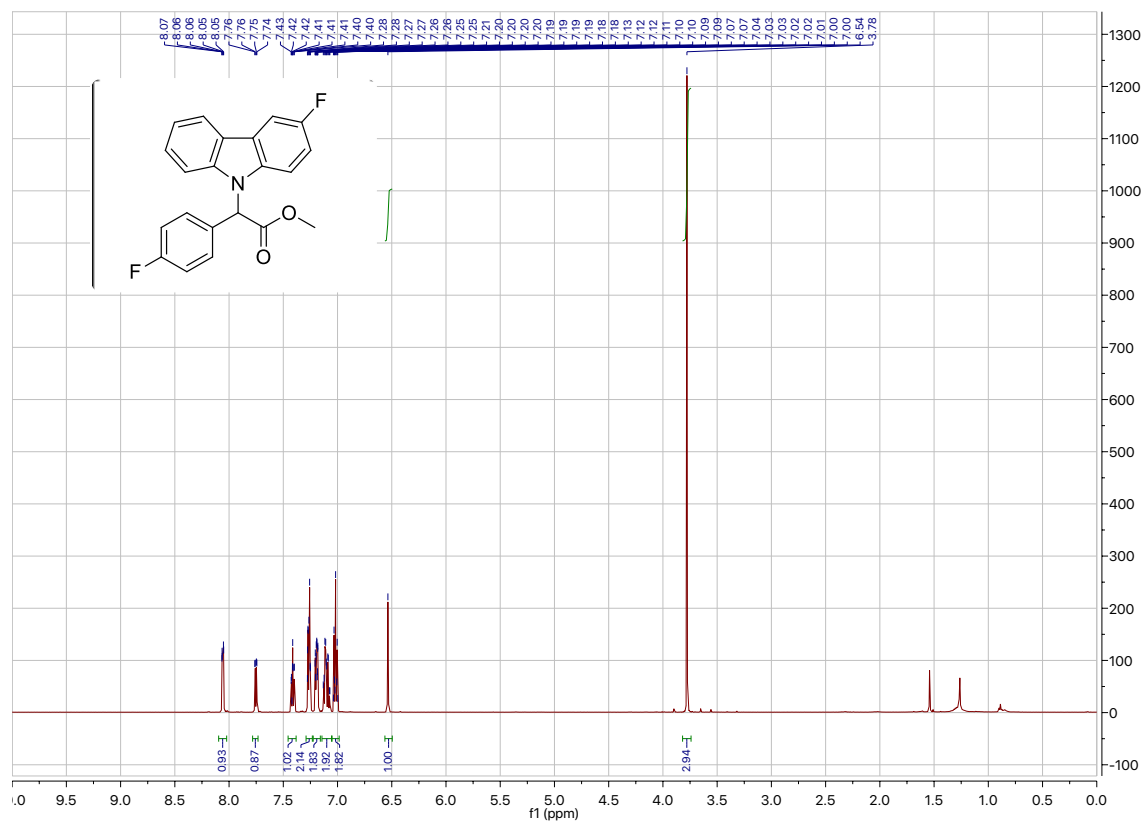

<sup>13</sup>C NMR (151 MHz, Chloroform-*d*)

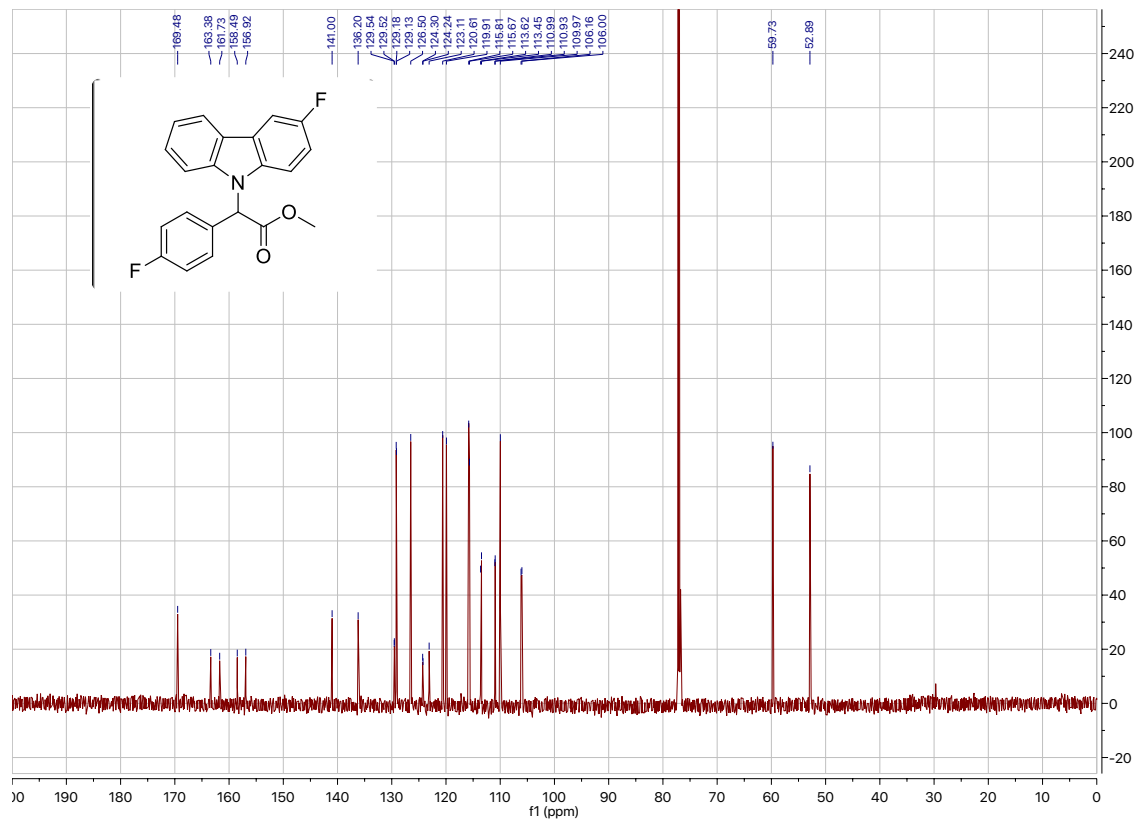

**<sup>19</sup>F NMR (564 MHz, Chloroform-*d*)**

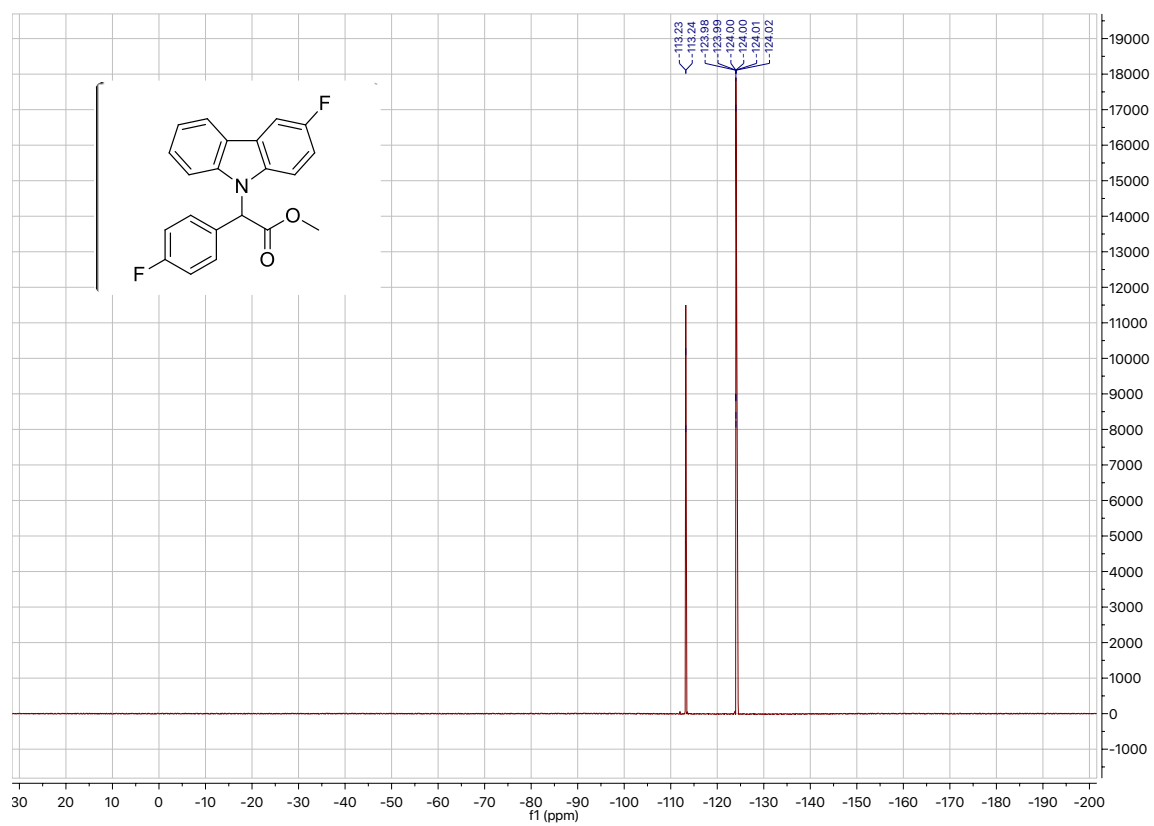

Methyl 2-(10,11-dihydro-5H-dibenzo[*b,f*]azepin-5-yl)-2-phenylacetate (7)  
<sup>1</sup>H NMR (600 MHz, Chloroform-*d*)

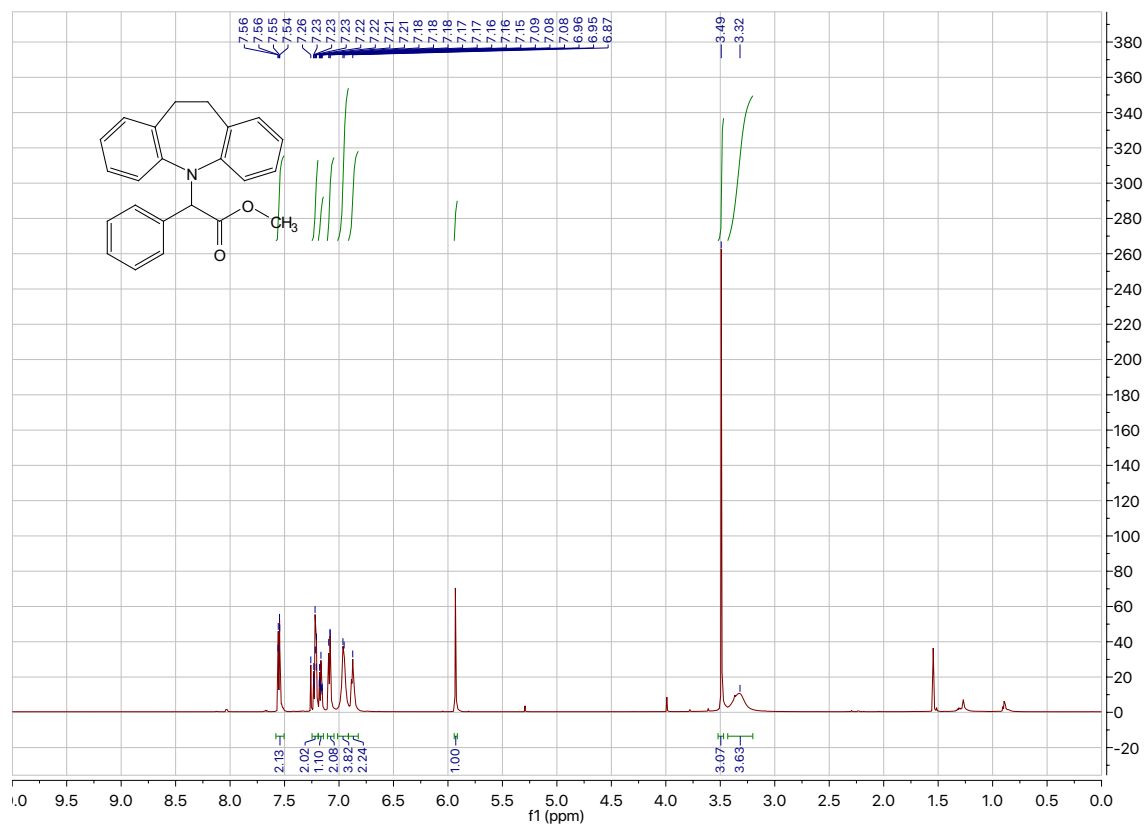

<sup>13</sup>C NMR (151 MHz, Chloroform-*d*)

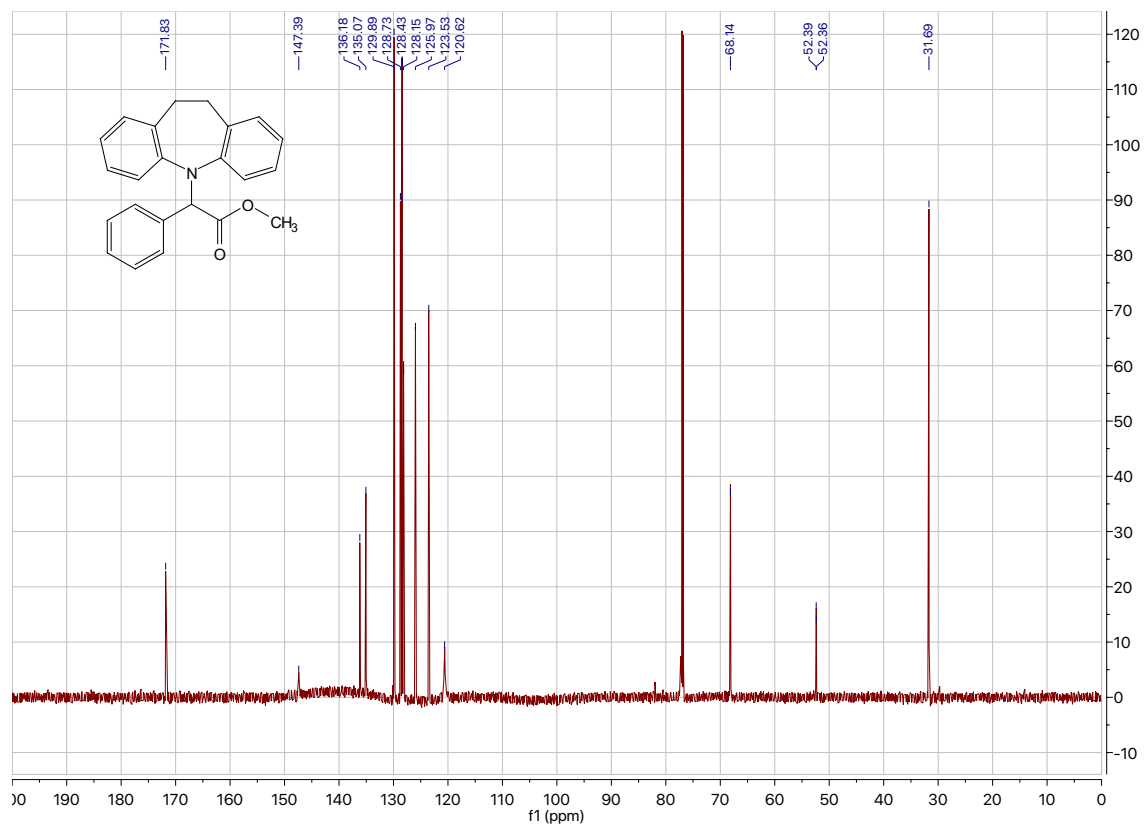

Supplement: jo9b01753_si_001.pdf [file jo9b01753_si_001.pdf]
